# Supplementary material for: Cellulose nanocrystal-reinforced poly(5-triethoxysilyl-2-norbornene) composites
Source: Royal Society of Chemistry journal article supplement (doi:10.1039/c9py00963a), 2019-09-18
Supplement: c9py00963a1.pdf [file c9py00963a1.pdf]

# Cellulose Nanocrystal-Reinforced Poly(5-triethoxysilyl-2-norbornene) Composites

*Keith D. Hendren,<sup>a†</sup> Morgan A. Higgins,<sup>b†</sup> Brian K. Long,<sup>b\*</sup> & E. Johan Foster<sup>a\*</sup>*

<sup>a</sup>Virginia Polytechnic and State University Materials Science and Engineering 445 Turner Street  
Blacksburg VA 24061

<sup>b</sup>University of Tennessee Department of Chemistry 1420 Circle Dr. Knoxville, TN 37996-1600

<sup>†</sup>Authors contributed equally to the manuscript

\*Correspondence to long@utk.edu and johanf@vt.edu

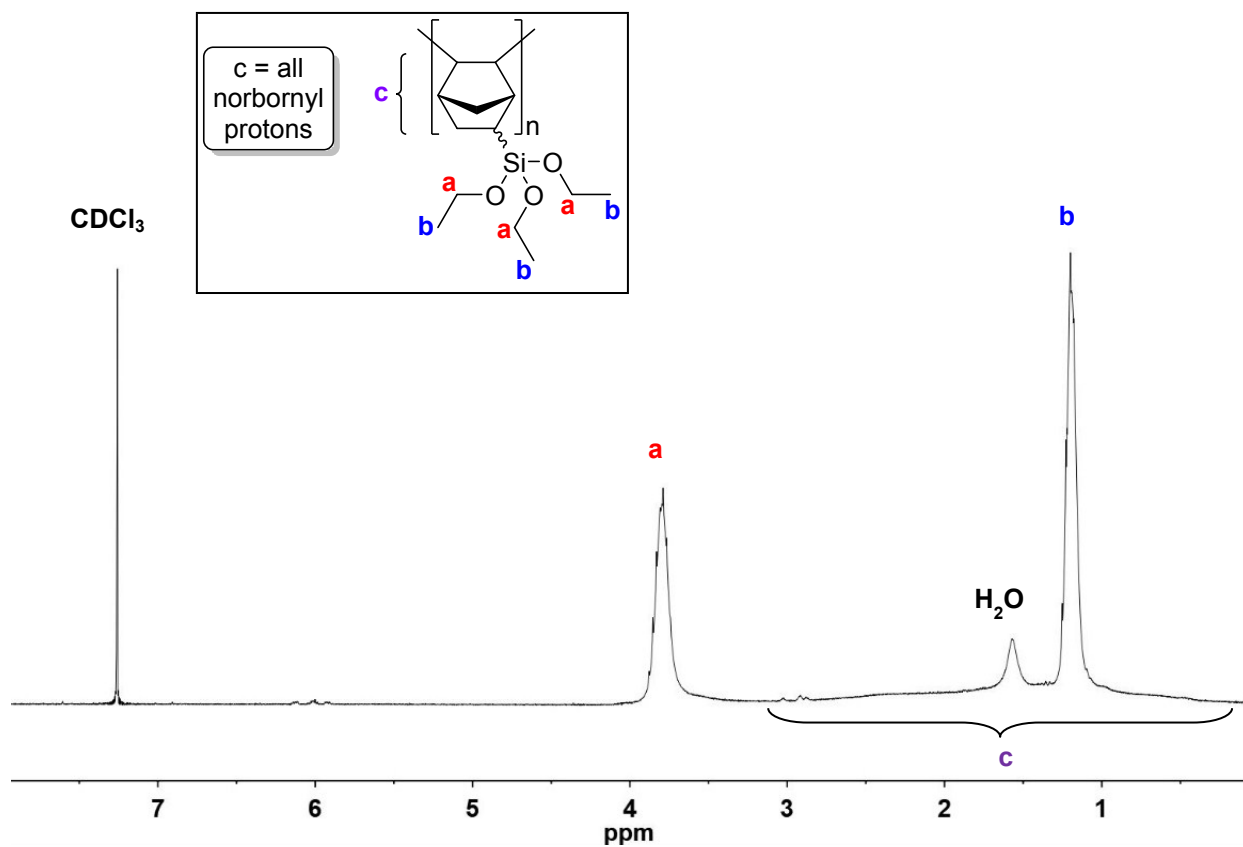

Figure S1.  $^1\text{H-NMR}$  spectrum of poly(triethoxysilylnorbornene) (PTESN).

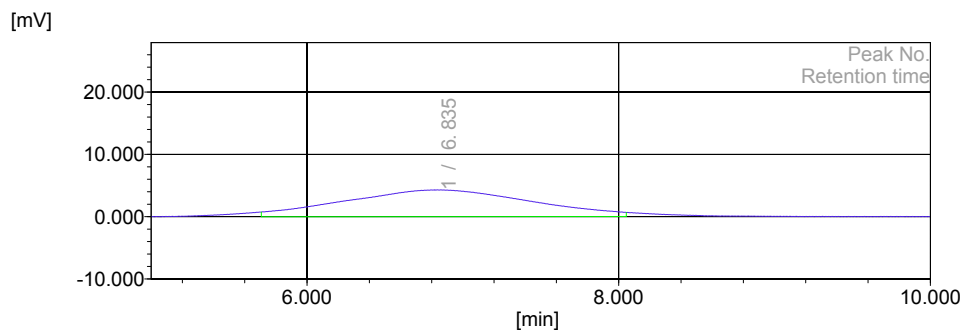

Result of molecular weight calculation (RI)

Peak 1 Valley Peak

|               | [min] | [mV]  | [mol]        |         |           |
|---------------|-------|-------|--------------|---------|-----------|
| Peak start    | 5.707 | 0.738 | 4,150,389    | Mn      | 226,911   |
| Peak top      | 6.835 | 4.306 | 316,334      | Mw      | 494,593   |
| Peak end      | 8.048 | 0.679 | 50,665       | Mz      | 1,132,687 |
|               |       |       |              | Mz+1    | 2,005,407 |
|               |       |       |              | Mv      | 494,593   |
| Height [mV]   |       |       | 4.309        | Mp      | 304,931   |
| Area [mV*sec] |       |       | 358.240      | Mz/Mw   | 2.290     |
| Area% [%]     |       |       | 100.000      | Mw/Mn   | 2.180     |
| [eta]         |       |       | 494592.63357 | Mz+1/Mw | 4.055     |

Figure S2. GPC of poly(triethoxysilylnorbornene) (PTESN).

Table S1. DMA data at various temperatures.

| Temperature (°C) | Storage Modulus (MPa) |           |          |           |            |            |
|------------------|-----------------------|-----------|----------|-----------|------------|------------|
|                  | 0-CNC                 | 1-CNC     | 5-CNC    | 10-CNC    | 15-CNC     | 20-CNC     |
| 25               | 400 ± 100             | 300 ± 100 | 510 ± 90 | 900 ± 300 | 1100 ± 300 | 1200 ± 200 |
| 50               | 400 ± 100             | 300 ± 100 | 510 ± 80 | 900 ± 300 | 1100 ± 300 | 1100 ± 200 |
| 100              | 320 ± 70              | 300 ± 100 | 460 ± 50 | 822 ± 200 | 900 ± 200  | 900 ± 200  |
| 200              | 310 ± 3               | 210 ± 90  | 320 ± 10 | 570 ± 80  | 520 ± 100  | 600 ± 100  |
| 300              | 174 ± 4               | 120 ± 40  | 170 ± 20 | 230 ± 40  | 170 ± 30   | 200 ± 30   |

Table S2. Tensile data

| Sample       | Young's Modulus (MPa) | Maximum Tensile Stress (MPa) | Strain at break (%) | Toughness kJ m <sup>-3</sup> |
|--------------|-----------------------|------------------------------|---------------------|------------------------------|
| PTESN        | 540 ± 50              | 12 ± 4                       | 5 ± 2               | 230 ± 70                     |
| 1-CNC-PTESN  | 600 ± 200             | 15 ± 4                       | 3 ± 2               | 310 ± 260                    |
| 5-CNC-PTESN  | 700 ± 100             | 12.0 ± 0.7                   | 2.1 ± 0.4           | 140 ± 30                     |
| 10-CNC-PTESN | 840 ± 70              | 13 ± 1                       | 1.9 ± 0.2           | 130 ± 20                     |
| 15-CNC-PTESN | 820 ± 70              | 10 ± 2                       | 1.6 ± 0.2           | 80 ± 20                      |
| 20-CNC-PTESN | 970 ± 80              | 12 ± 1                       | 1.5 ± 0.2           | 80 ± 30                      |

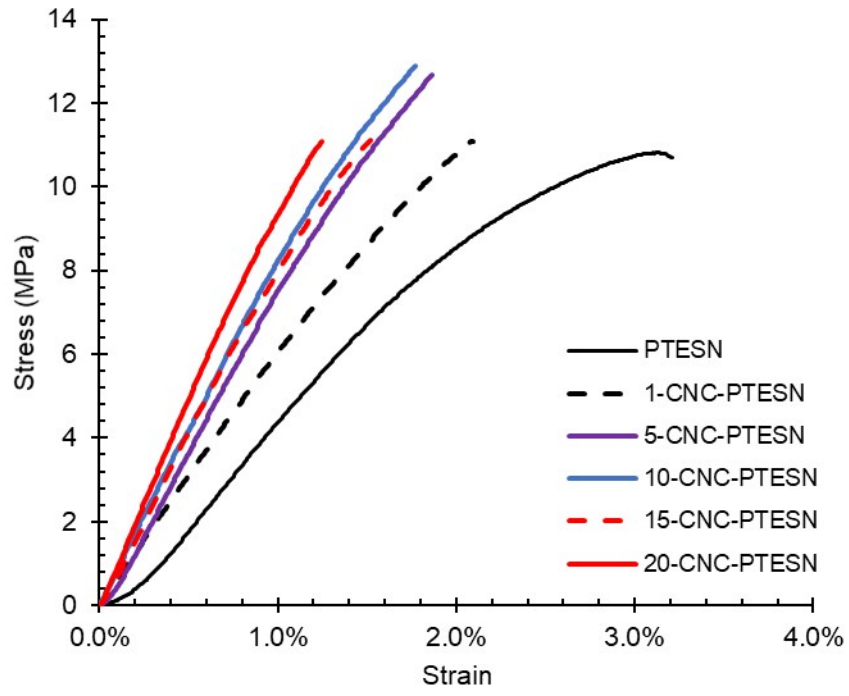

Figure S3: Representative tensile plots from PTESN CNC composites.

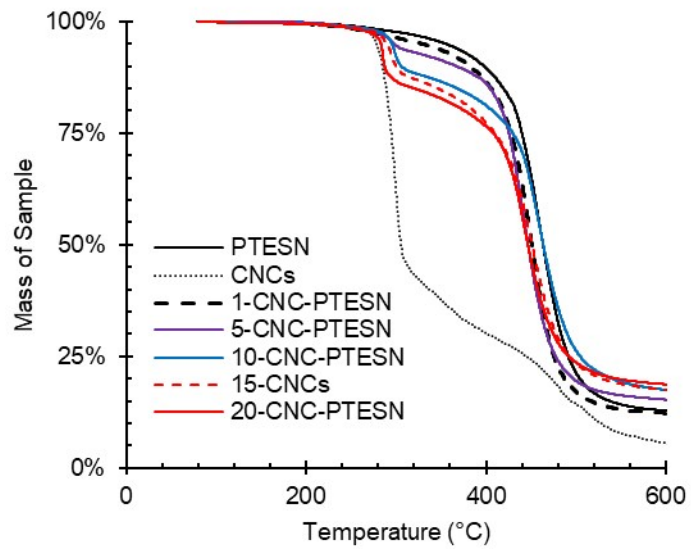

Figure S4: Thermogravimetric data for PTESN, 1-CNC-PTESN, 5-CNC-PTESN, 10-CNC-PTESN, 15-CNC-PTESN, and 20-CNC-PTESN.

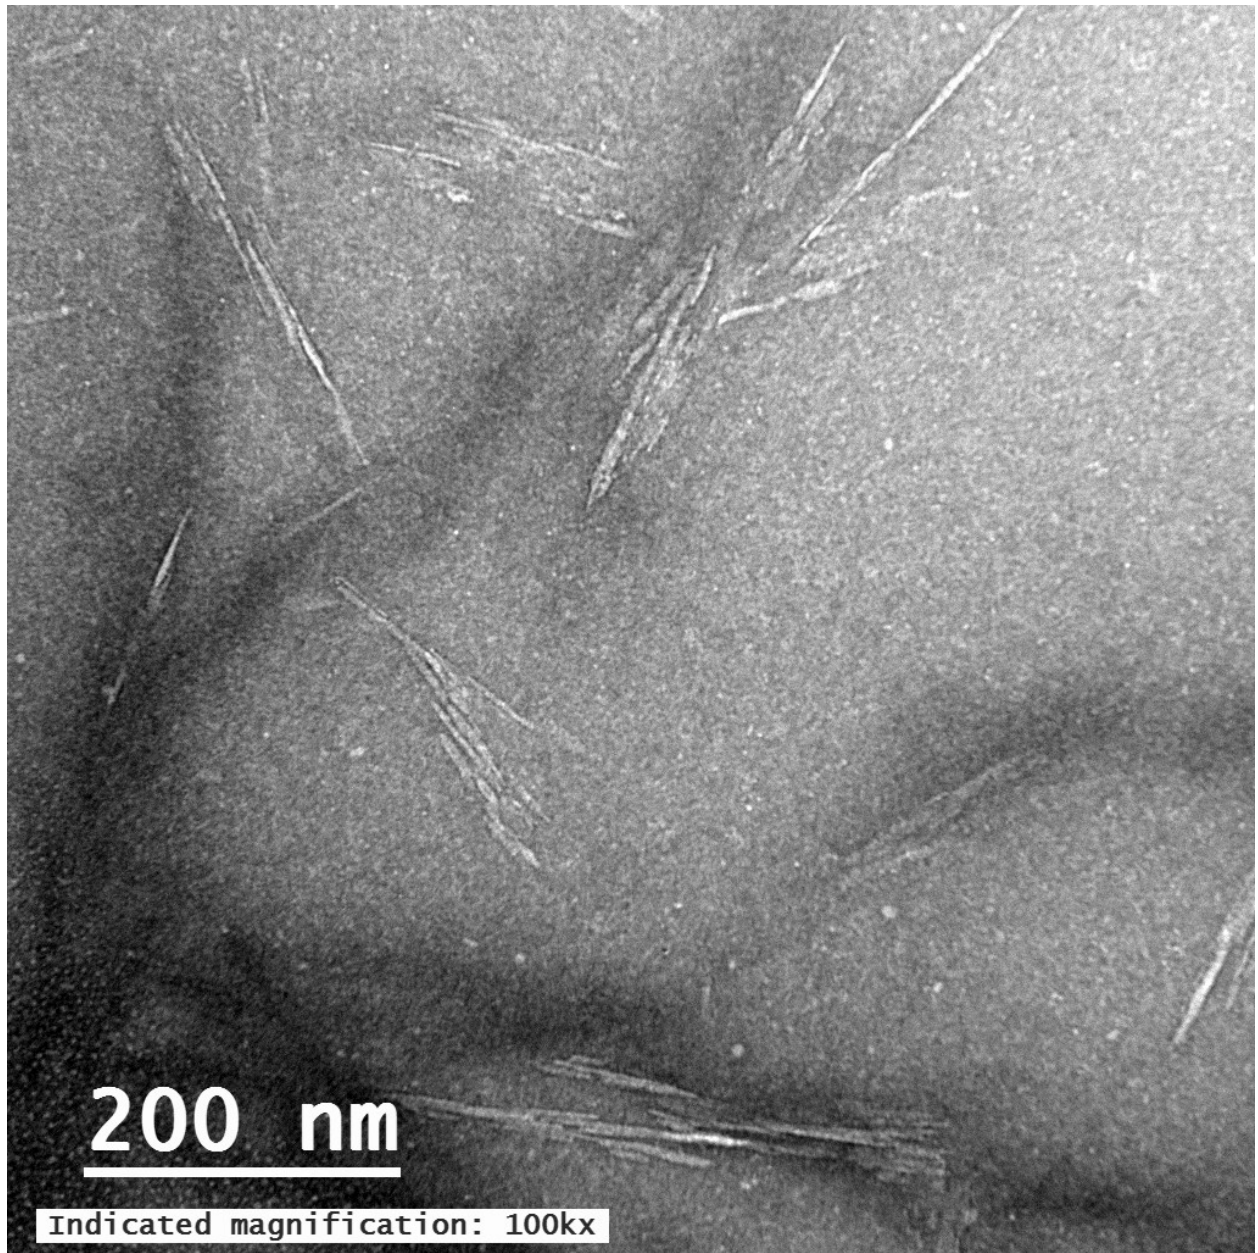

Figure S5: TEM Micrograph of University of Maine CNCs. CNCs have dimensions of  $90 \pm 40$  and  $7 \pm 2$ . Image was taken on JEOL 2100 TEM. Photo credit Rose Roberts and Kelly Stinson Bagby.
